# Supplementary material for: Treating (low-risk) DCIS patients: What can we learn from real-world cancer registry evidence?
Source: PubMed Central journal article supplement (PMC8062323; doi:10.1007/s10549-020-06042-1), 2021-01-03
Supplement: 10549_2020_6042_MOESM1_ESM.pdf [file 10549_2020_6042_MOESM1_ESM.pdf]

# ***Online Only Supplements Accompanying:*** **Treating (low-risk) DCIS Patients: What can we learn from real-world cancer registry evidence?**

Danalyn Byng,<sup>1,2</sup> Valesca P. Retèl,<sup>1,2</sup> Michael Schaapveld,<sup>1</sup> Jelle Wesseling,<sup>3</sup> Wim H. van Harten<sup>1,2</sup>

<sup>1</sup>Division of Psychosocial Research and Epidemiology, The Netherlands Cancer Institute-Antoni van Leeuwenhoek Hospital, Plesmanlaan 121, 1066 CX Amsterdam, The Netherlands.

<sup>2</sup>Health Technology and Services Research Department, Technical Medical Centre, University of Twente, P.O. Box 217, 7500 AE Enschede, The Netherlands.

<sup>3</sup>Division of Molecular Pathology, The Netherlands Cancer Institute-Antoni van Leeuwenhoek Hospital, Plesmanlaan 121, 1066 CX Amsterdam, The Netherlands.

## **Contents**

|                                                                                                                                                         |   |
|---------------------------------------------------------------------------------------------------------------------------------------------------------|---|
| Supplementary Table 1. Probability of Remaining in DCIS State (state occupancy probability of “progression-free survival”).....                         | 1 |
| Supplementary Table 2. Transition 1: probability of transitioning from DCIS state to ipsilateral invasive breast cancer ≤5 years post-diagnosis.....    | 2 |
| Supplementary Table 3. Transition 2: probability of transitioning from DCIS state to ipsilateral invasive breast cancer >5 years post-diagnosis.....    | 3 |
| Supplementary Table 4. Transition 3: probability of transitioning from DCIS state to contralateral invasive breast cancer.....                          | 4 |
| Supplementary Table 5. Transition 4: probability of transitioning from DCIS state to death without progression.....                                     | 5 |
| Supplementary Table 6. Transition 5: probability of transitioning from ipsilateral invasive breast cancer (≤5 years post-DCIS diagnosis) to death ..... | 6 |
| Supplementary Table 7. Transition 6: probability of transitioning from ipsilateral invasive breast cancer (>5 years post-DCIS diagnosis) to death ..... | 7 |
| Supplementary Table 8. Transition 7: probability of transitioning from contralateral invasive breast cancer to death.....                               | 8 |
| Supplementary Figure 1: State occupation probabilities and transition probabilities for women with low-risk features .....                              | 9 |

Supplementary Table 1. Probability of Remaining in DCIS State (state occupancy probability of "progression-free survival")

|         | No treatment |       | All low-risk DCIS patients |       |        |       |       |       | Propensity Score-Matched 1:2 low-risk DCIS patients |       |        |       |       |       |
|---------|--------------|-------|----------------------------|-------|--------|-------|-------|-------|-----------------------------------------------------|-------|--------|-------|-------|-------|
|         |              |       | BCS                        |       | BCS+RT |       | MAST  |       | BCS                                                 |       | BCS+RT |       | MAST  |       |
|         | Pr.          | SE    | Pr.                        | SE    | Pr.    | Pr.   | Pr.   | SE    | Pr.                                                 | SE    | Pr.    | Pr.   | Pr.   | SE    |
| Year 0  | 1.000        | 0.000 | 1.000                      | 0.000 | 1.000  | 1.000 | 1.000 | 0.000 | 1.000                                               | 0.000 | 1.000  | 1.000 | 1.000 | 0.000 |
| Year 1  | 0.988        | 0.006 | 0.990                      | 0.001 | 0.995  | 0.001 | 0.986 | 0.002 | 0.990                                               | 0.004 | 0.993  | 0.003 | 0.985 | 0.006 |
| Year 2  | 0.975        | 0.009 | 0.980                      | 0.002 | 0.988  | 0.001 | 0.979 | 0.003 | 0.987                                               | 0.005 | 0.974  | 0.007 | 0.982 | 0.006 |
| Year 3  | 0.958        | 0.011 | 0.969                      | 0.002 | 0.978  | 0.002 | 0.971 | 0.003 | 0.976                                               | 0.006 | 0.960  | 0.008 | 0.977 | 0.007 |
| Year 4  | 0.954        | 0.012 | 0.960                      | 0.003 | 0.967  | 0.002 | 0.962 | 0.004 | 0.970                                               | 0.007 | 0.948  | 0.009 | 0.972 | 0.008 |
| Year 5  | 0.934        | 0.015 | 0.942                      | 0.003 | 0.957  | 0.002 | 0.951 | 0.005 | 0.957                                               | 0.009 | 0.934  | 0.011 | 0.955 | 0.011 |
| Year 6  | 0.916        | 0.017 | 0.926                      | 0.004 | 0.945  | 0.003 | 0.938 | 0.005 | 0.943                                               | 0.010 | 0.932  | 0.011 | 0.948 | 0.011 |
| Year 7  | 0.902        | 0.018 | 0.908                      | 0.004 | 0.932  | 0.003 | 0.925 | 0.006 | 0.918                                               | 0.013 | 0.919  | 0.012 | 0.941 | 0.012 |
| Year 8  | 0.882        | 0.021 | 0.892                      | 0.005 | 0.918  | 0.004 | 0.914 | 0.006 | 0.898                                               | 0.015 | 0.916  | 0.013 | 0.937 | 0.013 |
| Year 9  | 0.859        | 0.023 | 0.873                      | 0.005 | 0.902  | 0.004 | 0.903 | 0.007 | 0.885                                               | 0.016 | 0.896  | 0.015 | 0.932 | 0.014 |
| Year 10 | 0.846        | 0.024 | 0.855                      | 0.006 | 0.882  | 0.004 | 0.887 | 0.008 | 0.871                                               | 0.017 | 0.881  | 0.016 | 0.911 | 0.017 |

Supplementary Table 2. Transition 1: probability of transitioning from DCIS state to ipsilateral invasive breast cancer ≤5 years post-diagnosis

|        | No treatment |       | All low-risk DCIS patients |       |        |       |       |       | Propensity Score-Matched 1:2 low-risk DCIS patients |       |        |       |       |       |
|--------|--------------|-------|----------------------------|-------|--------|-------|-------|-------|-----------------------------------------------------|-------|--------|-------|-------|-------|
|        |              |       | BCS                        |       | BCS+RT |       | MAST  |       | BCS                                                 |       | BCS+RT |       | MAST  |       |
|        | Pr.          | SE    | Pr.                        | SE    | Pr.    | SE    | Pr.   | SE    | Pr.                                                 | SE    | Pr.    | SE    | Pr.   | SE    |
| Year 0 | 0.000        | 0.000 | 0.000                      | 0.000 | 0.000  | 0.000 | 0.000 | 0.000 | 0.000                                               | 0.000 | 0.000  | 0.000 | 0.000 | 0.000 |
| Year 1 | 0.009        | 0.005 | 0.004                      | 0.001 | 0.000  | 0.000 | 0.001 | 0.001 | 0.003                                               | 0.002 | 0.000  | 0.000 | 0.000 | 0.000 |
| Year 2 | 0.009        | 0.005 | 0.008                      | 0.001 | 0.000  | 0.000 | 0.001 | 0.001 | 0.003                                               | 0.002 | 0.003  | 0.002 | 0.000 | 0.000 |
| Year 3 | 0.009        | 0.005 | 0.011                      | 0.001 | 0.002  | 0.000 | 0.001 | 0.001 | 0.007                                               | 0.003 | 0.003  | 0.002 | 0.002 | 0.002 |
| Year 4 | 0.009        | 0.005 | 0.013                      | 0.002 | 0.003  | 0.001 | 0.002 | 0.001 | 0.007                                               | 0.003 | 0.003  | 0.002 | 0.002 | 0.002 |
| Year 5 | 0.009        | 0.005 | 0.017                      | 0.002 | 0.004  | 0.001 | 0.003 | 0.001 | 0.009                                               | 0.004 | 0.003  | 0.002 | 0.005 | 0.003 |

BCS: breast conserving surgery; BCS+RT: breast conserving surgery + radiotherapy; MAST: mastectomy; Pr.: probability; SE: standard error

Supplementary Table 3. Transition 2: probability of transitioning from DCIS state to ipsilateral invasive breast cancer >5 years post-diagnosis

|         | No treatment |       | All low-risk DCIS patients |       |        |       |       |       | Propensity Score-Matched 1:2<br>low-risk DCIS patients |       |        |       |       |       |       |
|---------|--------------|-------|----------------------------|-------|--------|-------|-------|-------|--------------------------------------------------------|-------|--------|-------|-------|-------|-------|
|         |              |       | BCS                        |       | BCS+RT |       | MAST  |       | BCS                                                    |       | BCS+RT |       | MAST  |       |       |
|         | Pr.          | SE    | Pr.                        | SE    | Pr.    | SE    | Pr.   | SE    | Pr.                                                    | SE    | Pr.    | SE    | Pr.   | SE    |       |
| Year 0  | 0.000        | 0.000 | 0.000                      | 0.000 | 0.000  | 0.000 | 0.000 | 0.000 | 0.000                                                  | 0.000 | 0.000  | 0.000 | 0.000 | 0.000 | 0.000 |
| Year 1  | 0.000        | 0.000 | 0.000                      | 0.000 | 0.000  | 0.000 | 0.000 | 0.000 | 0.000                                                  | 0.000 | 0.000  | 0.000 | 0.000 | 0.000 | 0.000 |
| Year 2  | 0.000        | 0.000 | 0.000                      | 0.000 | 0.000  | 0.000 | 0.000 | 0.000 | 0.000                                                  | 0.000 | 0.000  | 0.000 | 0.000 | 0.000 | 0.000 |
| Year 3  | 0.000        | 0.000 | 0.000                      | 0.000 | 0.000  | 0.000 | 0.000 | 0.000 | 0.000                                                  | 0.000 | 0.000  | 0.000 | 0.000 | 0.000 | 0.000 |
| Year 4  | 0.000        | 0.000 | 0.000                      | 0.000 | 0.000  | 0.000 | 0.000 | 0.000 | 0.000                                                  | 0.000 | 0.000  | 0.000 | 0.000 | 0.000 | 0.000 |
| Year 5  | 0.000        | 0.000 | 0.000                      | 0.000 | 0.000  | 0.000 | 0.000 | 0.000 | 0.000                                                  | 0.000 | 0.000  | 0.000 | 0.000 | 0.000 | 0.000 |
| Year 6  | 0.004        | 0.004 | 0.005                      | 0.001 | 0.003  | 0.001 | 0.001 | 0.001 | 0.004                                                  | 0.003 | 0.000  | 0.000 | 0.000 | 0.000 | 0.000 |
| Year 7  | 0.004        | 0.004 | 0.010                      | 0.002 | 0.005  | 0.001 | 0.001 | 0.001 | 0.015                                                  | 0.006 | 0.003  | 0.003 | 0.000 | 0.000 | 0.000 |
| Year 8  | 0.015        | 0.008 | 0.014                      | 0.002 | 0.007  | 0.001 | 0.001 | 0.001 | 0.017                                                  | 0.006 | 0.006  | 0.004 | 0.000 | 0.000 | 0.000 |
| Year 9  | 0.015        | 0.008 | 0.020                      | 0.002 | 0.009  | 0.001 | 0.001 | 0.001 | 0.020                                                  | 0.007 | 0.006  | 0.004 | 0.000 | 0.000 | 0.000 |
| Year 10 | 0.021        | 0.010 | 0.021                      | 0.002 | 0.013  | 0.002 | 0.002 | 0.001 | 0.025                                                  | 0.008 | 0.006  | 0.004 | 0.005 | 0.005 | 0.005 |

BCS: breast conserving surgery; BCS+RT: breast conserving surgery + radiotherapy; MAST: mastectomy; Pr.: probability; SE: standard error

Supplementary Table 4. Transition 3: probability of transitioning from DCIS state to contralateral invasive breast cancer

|         | No treatment |       | All low-risk DCIS patients |       |        |       |       |       | Propensity Score-Matched 1:2 low-risk DCIS patients |       |        |       |       |       |
|---------|--------------|-------|----------------------------|-------|--------|-------|-------|-------|-----------------------------------------------------|-------|--------|-------|-------|-------|
|         |              |       | BCS                        |       | BCS+RT |       | MAST  |       | BCS                                                 |       | BCS+RT |       | MAST  |       |
|         | Pr.          | SE    | Pr.                        | SE    | Pr.    | SE    | Pr.   | SE    | Pr.                                                 | SE    | Pr.    | SE    | Pr.   | SE    |
| Year 0  | 0.000        | 0.000 | 0.000                      | 0.000 | 0.000  | 0.000 | 0.000 | 0.000 | 0.000                                               | 0.000 | 0.000  | 0.000 | 0.000 | 0.000 |
| Year 1  | 0.003        | 0.003 | 0.004                      | 0.001 | 0.004  | 0.001 | 0.011 | 0.002 | 0.007                                               | 0.003 | 0.007  | 0.003 | 0.011 | 0.005 |
| Year 2  | 0.009        | 0.005 | 0.006                      | 0.001 | 0.006  | 0.001 | 0.013 | 0.002 | 0.007                                               | 0.003 | 0.010  | 0.004 | 0.011 | 0.005 |
| Year 3  | 0.013        | 0.006 | 0.009                      | 0.001 | 0.010  | 0.001 | 0.015 | 0.002 | 0.010                                               | 0.004 | 0.017  | 0.005 | 0.011 | 0.005 |
| Year 4  | 0.013        | 0.006 | 0.013                      | 0.002 | 0.014  | 0.001 | 0.018 | 0.003 | 0.016                                               | 0.005 | 0.023  | 0.006 | 0.014 | 0.006 |
| Year 5  | 0.021        | 0.009 | 0.017                      | 0.002 | 0.016  | 0.001 | 0.022 | 0.003 | 0.018                                               | 0.006 | 0.028  | 0.007 | 0.019 | 0.007 |
| Year 6  | 0.025        | 0.010 | 0.021                      | 0.002 | 0.020  | 0.002 | 0.024 | 0.003 | 0.026                                               | 0.007 | 0.028  | 0.007 | 0.023 | 0.008 |
| Year 7  | 0.035        | 0.012 | 0.024                      | 0.002 | 0.023  | 0.002 | 0.028 | 0.004 | 0.033                                               | 0.008 | 0.028  | 0.007 | 0.026 | 0.008 |
| Year 8  | 0.040        | 0.013 | 0.028                      | 0.003 | 0.027  | 0.002 | 0.030 | 0.004 | 0.039                                               | 0.009 | 0.028  | 0.007 | 0.031 | 0.009 |
| Year 9  | 0.040        | 0.013 | 0.029                      | 0.003 | 0.029  | 0.002 | 0.033 | 0.004 | 0.039                                               | 0.009 | 0.024  | 0.007 | 0.035 | 0.010 |
| Year 10 | 0.046        | 0.014 | 0.032                      | 0.003 | 0.034  | 0.002 | 0.037 | 0.004 | 0.039                                               | 0.009 | 0.024  | 0.007 | 0.035 | 0.010 |

BCS: breast conserving surgery; BCS+RT: breast conserving surgery + radiotherapy; MAST: mastectomy; Pr.: probability; SE: standard error

Supplementary Table 5. Transition 4: probability of transitioning from DCIS state to death without progression

|         | No treatment |       | All low-risk DCIS patients |       |        |       |       |       | Propensity Score-Matched 1:2<br>low-risk DCIS patients |       |        |       |       |       |       |
|---------|--------------|-------|----------------------------|-------|--------|-------|-------|-------|--------------------------------------------------------|-------|--------|-------|-------|-------|-------|
|         |              |       | BCS                        |       | BCS+RT |       | MAST  |       | BCS                                                    |       | BCS+RT |       | MAST  |       |       |
|         | Pr.          | SE    | Pr.                        | SE    | Pr.    | SE    | Pr.   | SE    | Pr.                                                    | SE    | Pr.    | SE    | Pr.   | SE    |       |
| Year 0  | 0.000        | 0.000 | 0.000                      | 0.000 | 0.000  | 0.000 | 0.000 | 0.000 | 0.000                                                  | 0.000 | 0.000  | 0.000 | 0.000 | 0.000 | 0.000 |
| Year 1  | 0.000        | 0.000 | 0.002                      | 0.001 | 0.000  | 0.000 | 0.002 | 0.001 | 0.000                                                  | 0.000 | 0.000  | 0.000 | 0.005 | 0.003 |       |
| Year 2  | 0.006        | 0.005 | 0.006                      | 0.001 | 0.005  | 0.001 | 0.007 | 0.002 | 0.004                                                  | 0.002 | 0.012  | 0.005 | 0.007 | 0.004 |       |
| Year 3  | 0.020        | 0.008 | 0.010                      | 0.001 | 0.010  | 0.001 | 0.013 | 0.002 | 0.007                                                  | 0.004 | 0.018  | 0.006 | 0.009 | 0.005 |       |
| Year 4  | 0.024        | 0.009 | 0.014                      | 0.002 | 0.015  | 0.001 | 0.018 | 0.003 | 0.007                                                  | 0.004 | 0.024  | 0.006 | 0.012 | 0.005 |       |
| Year 5  | 0.032        | 0.010 | 0.023                      | 0.002 | 0.022  | 0.002 | 0.024 | 0.003 | 0.016                                                  | 0.006 | 0.032  | 0.008 | 0.021 | 0.008 |       |
| Year 6  | 0.040        | 0.012 | 0.030                      | 0.003 | 0.027  | 0.002 | 0.035 | 0.004 | 0.018                                                  | 0.006 | 0.035  | 0.008 | 0.025 | 0.008 |       |
| Year 7  | 0.045        | 0.013 | 0.039                      | 0.003 | 0.035  | 0.002 | 0.043 | 0.005 | 0.026                                                  | 0.007 | 0.045  | 0.010 | 0.028 | 0.009 |       |
| Year 8  | 0.050        | 0.014 | 0.048                      | 0.003 | 0.042  | 0.003 | 0.053 | 0.005 | 0.035                                                  | 0.009 | 0.045  | 0.010 | 0.028 | 0.009 |       |
| Year 9  | 0.068        | 0.017 | 0.057                      | 0.004 | 0.053  | 0.003 | 0.058 | 0.006 | 0.041                                                  | 0.010 | 0.065  | 0.012 | 0.028 | 0.009 |       |
| Year 10 | 0.068        | 0.017 | 0.067                      | 0.004 | 0.064  | 0.003 | 0.068 | 0.006 | 0.048                                                  | 0.011 | 0.080  | 0.014 | 0.044 | 0.013 |       |

BCS: breast conserving surgery; BCS+RT: breast conserving surgery + radiotherapy; MAST: mastectomy; Pr.: probability; SE: standard error

Supplementary Table 6. Transition 5: probability of transitioning from ipsilateral invasive breast cancer ( $\leq 5$  years post-DCIS diagnosis) to death

|         | No treatment |       | All low-risk DCIS patients |       |        |       |       |       | Propensity Score-Matched 1:2 low-risk DCIS patients |      |        |       |       |       |
|---------|--------------|-------|----------------------------|-------|--------|-------|-------|-------|-----------------------------------------------------|------|--------|-------|-------|-------|
|         |              |       | BCS                        |       | BCS+RT |       | MAST  |       | BCS                                                 |      | BCS+RT |       | MAST  |       |
|         | Pr.          | SE    | Pr.                        | SE    | Pr.    | SE    | Pr.   | SE    | Pr.                                                 | SE   | Pr.    | SE    | Pr.   | SE    |
| Year 0  | 0.000        | 0.000 | 0.000                      | 0.000 | 0.000  | 0.000 | 0.000 | 0.000 | 0.00                                                | 0.00 | 0.000  | 0.000 | 0.000 | 0.000 |
| Year 1  | 0.000        | 0.000 | 0.000                      | 0.000 | 0.000  | 0.000 | 0.000 | 0.000 | 0.00                                                | 0.00 | 0.000  | 0.000 | 0.000 | 0.000 |
| Year 2  | 0.000        | 0.000 | 0.036                      | 0.034 | 0.000  | 0.000 | 0.000 | 0.000 | 0.00                                                | 0.00 | 0.000  | 0.000 | 0.000 | 0.000 |
| Year 3  | 0.000        | 0.000 | 0.036                      | 0.034 | 0.111  | 0.099 | 0.000 | 0.000 | 0.00                                                | 0.00 | 0.500  | 0.250 | 0.000 | 0.000 |
| Year 4  | 0.000        | 0.000 | 0.052                      | 0.037 | 0.111  | 0.099 | 0.000 | 0.000 | 0.00                                                | 0.00 | 0.500  | 0.250 | 0.000 | 0.000 |
| Year 5  | 0.000        | 0.000 | 0.081                      | 0.041 | 0.111  | 0.099 | 0.000 | 0.000 | 0.00                                                | 0.00 | 0.500  | 0.250 | 0.000 | 0.000 |
| Year 6  | 0.000        | 0.000 | 0.137                      | 0.047 | 0.111  | 0.099 | 0.000 | 0.000 | 0.00                                                | 0.00 | 0.500  | 0.250 | 0.000 | 0.000 |
| Year 7  | 0.000        | 0.000 | 0.165                      | 0.050 | 0.111  | 0.099 | 0.000 | 0.000 | 0.00                                                | 0.00 | 0.500  | 0.250 | 0.000 | 0.000 |
| Year 8  | 0.000        | 0.000 | 0.194                      | 0.052 | 0.111  | 0.099 | 0.000 | 0.000 | 0.20                                                | 0.16 | 0.500  | 0.250 | 0.000 | 0.000 |
| Year 9  | 0.000        | 0.000 | 0.194                      | 0.052 | 0.111  | 0.099 | 0.500 | 0.250 | 0.20                                                | 0.16 | 0.500  | 0.250 | 0.000 | 0.000 |
| Year 10 | 0.000        | 0.000 | 0.211                      | 0.053 | 0.111  | 0.099 | 0.500 | 0.250 | 0.20                                                | 0.16 | 0.500  | 0.250 | 0.000 | 0.000 |

BCS: breast conserving surgery; BCS+RT: breast conserving surgery + radiotherapy; MAST: mastectomy; Pr.: probability; SE: standard error

Supplementary Table 7. Transition 6: probability of transitioning from ipsilateral invasive breast cancer (>5 years post-DCIS diagnosis) to death

|         | No treatment |       | All low-risk DCIS patients |       |        |       |       |       | Propensity Score-Matched 1:2 low-risk DCIS patients |       |        |       |       |       |
|---------|--------------|-------|----------------------------|-------|--------|-------|-------|-------|-----------------------------------------------------|-------|--------|-------|-------|-------|
|         |              |       | BCS                        |       | BCS+RT |       | MAST  |       | BCS                                                 |       | BCS+RT |       | MAST  |       |
|         | Pr.          | SE    | Pr.                        | SE    | Pr.    | SE    | Pr.   | SE    | Pr.                                                 | SE    | Pr.    | SE    | Pr.   | SE    |
| Year 0  | 0.000        | 0.000 | 0.000                      | 0.000 | 0.000  | 0.000 | 0.000 | 0.000 | 0.000                                               | 0.000 | 0.000  | 0.000 | 0.000 | 0.000 |
| Year 1  | 0.000        | 0.000 | 0.000                      | 0.000 | 0.000  | 0.000 | 0.000 | 0.000 | 0.000                                               | 0.000 | 0.000  | 0.000 | 0.000 | 0.000 |
| Year 2  | 0.000        | 0.000 | 0.000                      | 0.000 | 0.000  | 0.000 | 0.000 | 0.000 | 0.000                                               | 0.000 | 0.000  | 0.000 | 0.000 | 0.000 |
| Year 3  | 0.000        | 0.000 | 0.000                      | 0.000 | 0.000  | 0.000 | 0.000 | 0.000 | 0.000                                               | 0.000 | 0.000  | 0.000 | 0.000 | 0.000 |
| Year 4  | 0.000        | 0.000 | 0.000                      | 0.000 | 0.000  | 0.000 | 0.000 | 0.000 | 0.000                                               | 0.000 | 0.000  | 0.000 | 0.000 | 0.000 |
| Year 5  | 0.000        | 0.000 | 0.000                      | 0.000 | 0.000  | 0.000 | 0.000 | 0.000 | 0.000                                               | 0.000 | 0.000  | 0.000 | 0.000 | 0.000 |
| Year 6  | 0.000        | 0.000 | 0.000                      | 0.000 | 0.000  | 0.000 | 0.000 | 0.000 | 0.000                                               | 0.000 | 0.000  | 0.000 | 0.000 | 0.000 |
| Year 7  | 0.000        | 0.000 | 0.000                      | 0.000 | 0.045  | 0.043 | 0.000 | 0.000 | 0.000                                               | 0.000 | 0.000  | 0.000 | 0.000 | 0.000 |
| Year 8  | 0.000        | 0.000 | 0.023                      | 0.023 | 0.045  | 0.043 | 0.000 | 0.000 | 0.000                                               | 0.000 | 0.000  | 0.000 | 0.000 | 0.000 |
| Year 9  | 0.000        | 0.000 | 0.057                      | 0.032 | 0.073  | 0.050 | 0.000 | 0.000 | 0.125                                               | 0.109 | 0.000  | 0.000 | 0.000 | 0.000 |
| Year 10 | 0.000        | 0.000 | 0.088                      | 0.038 | 0.099  | 0.055 | 0.000 | 0.000 | 0.250                                               | 0.142 | 0.000  | 0.000 | 0.000 | 0.000 |

BCS: breast conserving surgery; BCS+RT: breast conserving surgery + radiotherapy; MAST: mastectomy; Pr.: probability; SE: standard error



Supplementary Table 8. Transition 7: probability of transitioning from contralateral invasive breast cancer to death

|         | No treatment |       | All low-risk DCIS patients |       |        |       |       |       | Propensity Score-Matched 1:2 low-risk DCIS patients |       |        |       |       |       |       |
|---------|--------------|-------|----------------------------|-------|--------|-------|-------|-------|-----------------------------------------------------|-------|--------|-------|-------|-------|-------|
|         |              |       | BCS                        |       | BCS+RT |       | MAST  |       | BCS                                                 |       | BCS+RT |       | MAST  |       |       |
|         | Pr.          | SE    | Pr.                        | SE    | Pr.    | SE    | Pr.   | SE    | Pr.                                                 | SE    | Pr.    | SE    | Pr.   | SE    |       |
| Year 0  | 0.000        | 0.000 | 0.000                      | 0.000 | 0.000  | 0.000 | 0.000 | 0.000 | 0.000                                               | 0.000 | 0.000  | 0.000 | 0.000 | 0.000 | 0.000 |
| Year 1  | 0.000        | 0.000 | 0.000                      | 0.000 | 0.000  | 0.000 | 0.000 | 0.000 | 0.000                                               | 0.000 | 0.000  | 0.000 | 0.000 | 0.000 | 0.000 |
| Year 2  | 0.000        | 0.000 | 0.040                      | 0.038 | 0.000  | 0.000 | 0.000 | 0.000 | 0.000                                               | 0.000 | 0.000  | 0.000 | 0.000 | 0.000 | 0.000 |
| Year 3  | 0.000        | 0.000 | 0.040                      | 0.038 | 0.017  | 0.017 | 0.000 | 0.000 | 0.000                                               | 0.000 | 0.000  | 0.000 | 0.000 | 0.000 | 0.000 |
| Year 4  | 0.000        | 0.000 | 0.040                      | 0.038 | 0.029  | 0.021 | 0.000 | 0.000 | 0.000                                               | 0.000 | 0.000  | 0.000 | 0.000 | 0.000 | 0.000 |
| Year 5  | 0.250        | 0.188 | 0.040                      | 0.038 | 0.058  | 0.026 | 0.025 | 0.024 | 0.000                                               | 0.000 | 0.000  | 0.000 | 0.000 | 0.000 | 0.000 |
| Year 6  | 0.250        | 0.188 | 0.040                      | 0.038 | 0.075  | 0.028 | 0.025 | 0.024 | 0.000                                               | 0.000 | 0.000  | 0.000 | 0.000 | 0.000 | 0.000 |
| Year 7  | 0.250        | 0.188 | 0.086                      | 0.043 | 0.075  | 0.028 | 0.025 | 0.024 | 0.000                                               | 0.000 | 0.000  | 0.000 | 0.000 | 0.000 | 0.000 |
| Year 8  | 0.357        | 0.185 | 0.096                      | 0.044 | 0.098  | 0.030 | 0.025 | 0.024 | 0.077                                               | 0.071 | 0.000  | 0.000 | 0.000 | 0.000 | 0.000 |
| Year 9  | 0.357        | 0.185 | 0.145                      | 0.046 | 0.113  | 0.031 | 0.066 | 0.037 | 0.077                                               | 0.071 | 0.125  | 0.109 | 0.000 | 0.000 | 0.000 |
| Year 10 | 0.357        | 0.185 | 0.203                      | 0.049 | 0.120  | 0.032 | 0.107 | 0.045 | 0.077                                               | 0.071 | 0.125  | 0.109 | 0.000 | 0.000 | 0.000 |

BCS: breast conserving surgery; BCS+RT: breast conserving surgery + radiotherapy; MAST: mastectomy; Pr.: probability; SE: standard error

Supplementary Figure 1: State occupation probabilities and transition probabilities for women with low-risk features

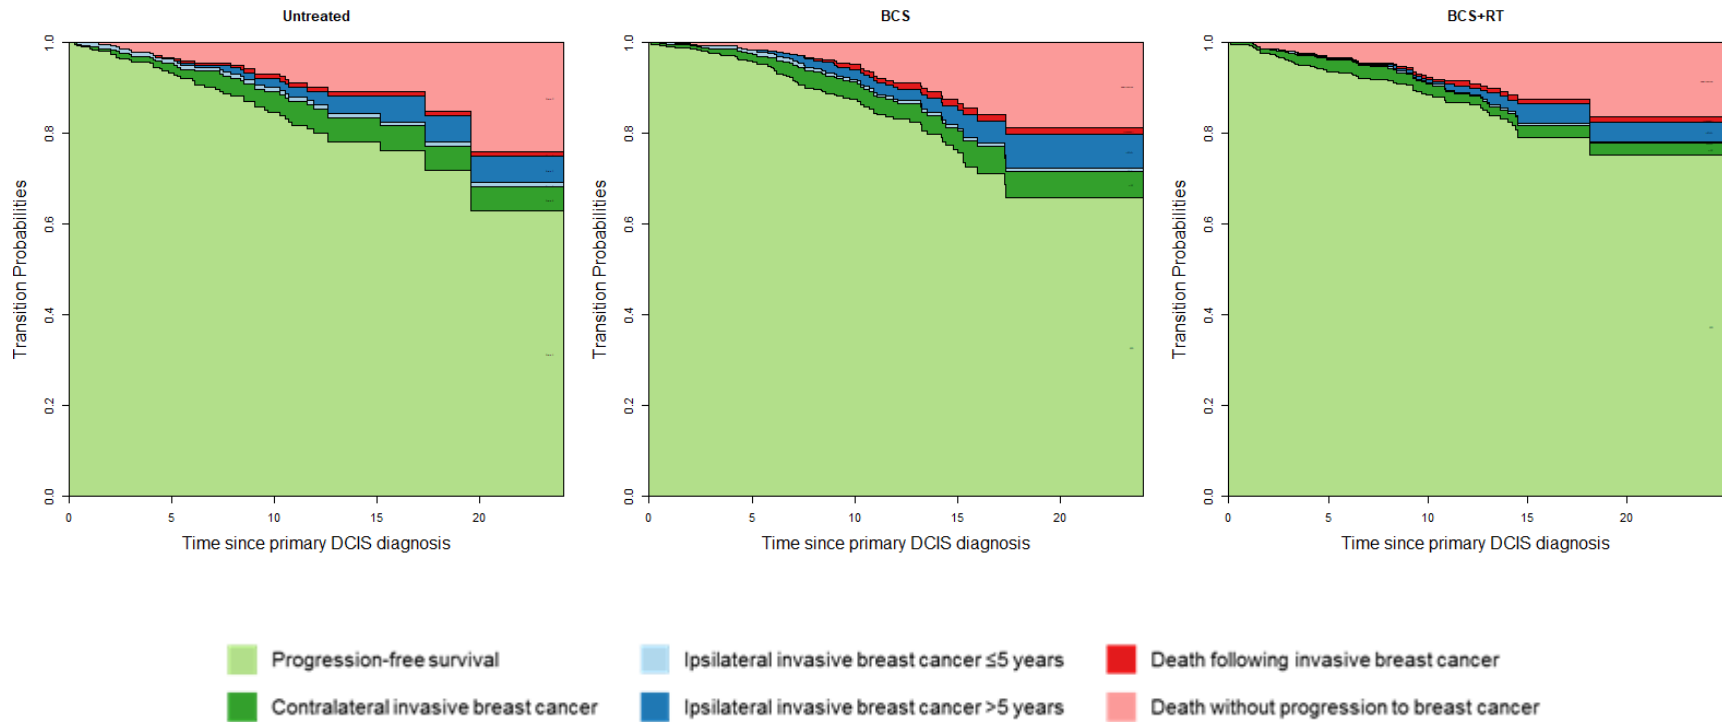

Transition probabilities calculated from the multi-state models are visualized for the different matched 1:2 treatment cohorts within the low-risk DCIS subgroup. These figures coincide with the data in Supplementary Tables 1-8. Each curve represents the instantaneous transition rate (or “progression”) to the different possible events of interest over time. The distance between the curves represents an individual’s probability of being in a specific health state at a specific time point (“state occupancy probability”).
